# Supplementary material for: Tracheids vs. Tree Rings as Proxies for Dendroclimatic Reconstruction at High Altitude: The Case of Pinus sibirica Du Tour
Source: MDPI journal article supplement (doi:10.3390/f15010167), 2024-01-12
Supplement: s1 [file s1]

## Supplementary Materials

### Mathematical description of the data preparation algorithms.

#### Temperature.

##### Input temperature data:

Raw temperature data  $T$  are considered as a set:

$$T = \{t_{year,doy} | year \in \{1929 \dots 2016\}, doy \in \{1 \dots 365\}\},$$

where  $doy$  is the name of the Day Of the Year (DOY) variable.

##### Internal data:

The intra-annual smoothed temperature  $T_{intra}$  with the sliding window  $w$  (in days) is a set:

$$T_{intra}(w) = \left\{ t_{year,doy}^w | year \in \{1929 \dots 2016\}, doy \in \{1 \dots 365\} \right\} \\ = \left\{ \frac{\sum_{d \in [doy - \lfloor \frac{w}{2} \rfloor \dots doy + \lfloor \frac{w}{2} \rfloor]} t_{year,d}}{w} \middle| \begin{array}{l} year \in \{1929 \dots 2016\}, \\ doy \in \{1 \dots 365\} \end{array} \right\}$$

- If  $i \leq 0$ :  $t_{year,i} = t_{year-1,365+i}$
- If  $i > 365$ :  $t_{year,i} = t_{year+1,i-365}$
- If  $year \notin \{1929 \dots 2016\}$ ,  $t_{year,i}$  is not considered

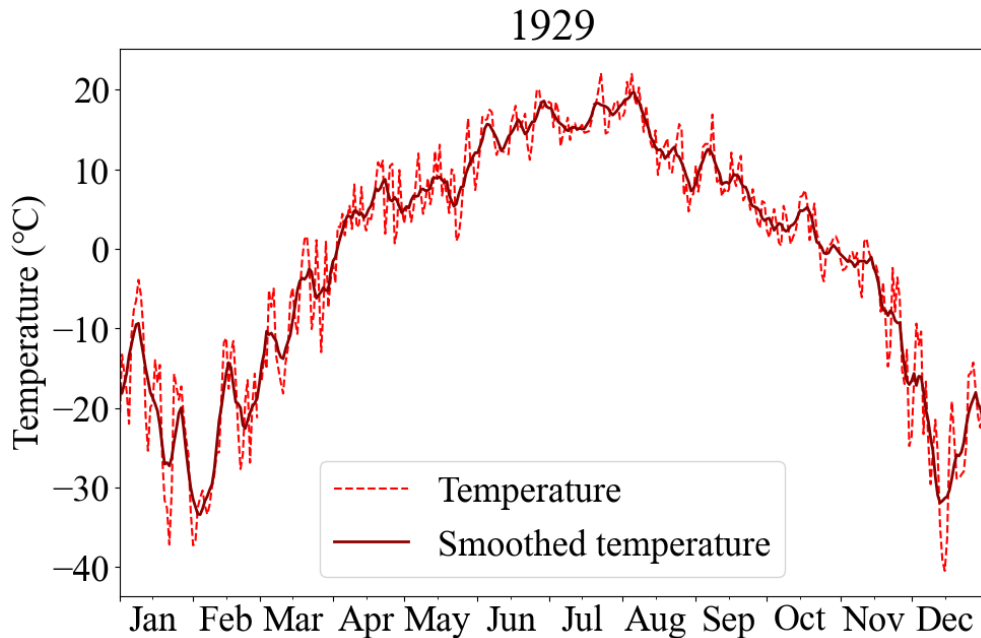

**Figure S1.** Example of daily (or intra-annual) smoothing. The raw (red dashed) and smoothed ( $w=7$ , 1 day step) daily Tashtyp temperature.

### Dependent variable:

The inter-annual smoothed temperature  $T_{inter}$  with the sliding window  $W$  for DOY  $doy$ :

$$T_{inter}(w, W, doy) = \left\{ t_{year, doy}^{w, W} \middle| year \in \{1929 \dots 2016\} \right\} = \left\{ \frac{\sum_{y \in [year - \frac{W}{2} \dots year + \frac{W}{2}]} t_{y, doy}^w}{W} \middle| year \in \{1929 \dots 2016\} \right\},$$

where  $doy \in DOY_{sig}(w, W)$ ;

$DOY_{sig}(w, W) \subseteq \{152, \dots, 243\}$  (the subset of tree-ring growing days (growing season)) is the set of DOYs for which the Pearson correlation between the inter-annual and the intra-annual smoothed temperatures ( $\{t_{year, doy}^{w, W} \mid year \in \{1929 \dots 2016\}\}$  and  $\{t_{year, doy}^w \mid year \in \{1929 \dots 2016\}\}$ ) was significant ( $p < 0.001$ ) (see Figure S3 and an example in Table S3)

In other terms, for each set of  $w, W$ ,  $|DOY_{sig}(w, W)|$  time series were obtained.

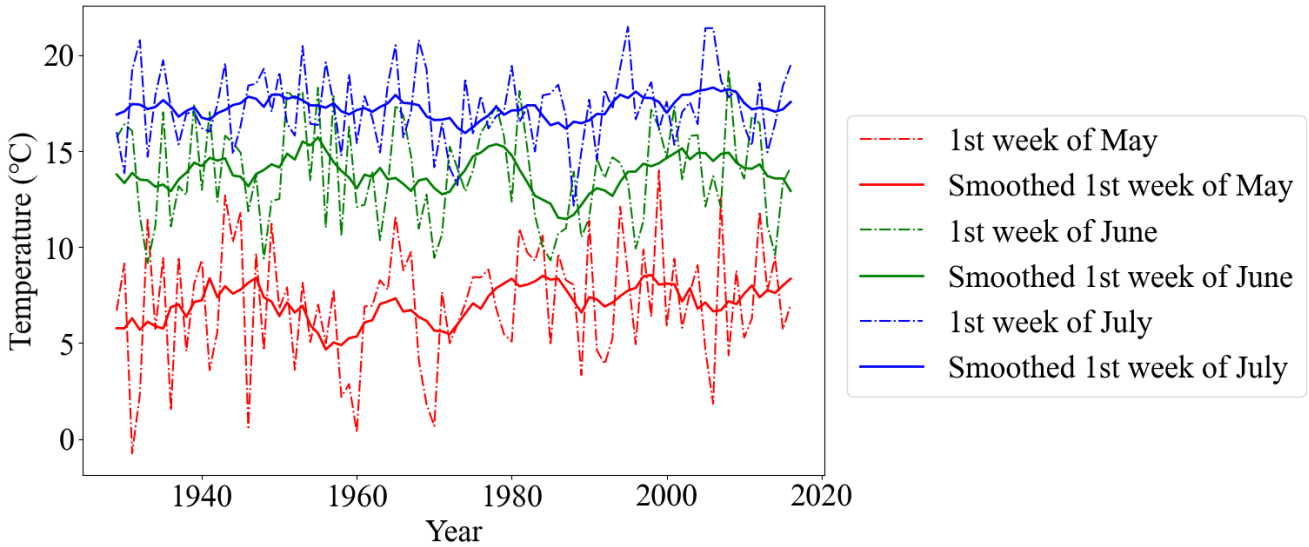

**Figure S2.** Example of unsmoothed and 9-year (or inter-annual) smoothing of temperature characteristics: mean values of the 1st week of May (red dotted curve), June (green dotted curve) and July (blue dotted curve) and their smoothed analogs (solid thick lines), respectively.

**Table S1.** Examples of the temperature time series  $T_{inter}(w, W, doy)$  for  $w = 7, W = 9, |DOY_{sig}(7, 9)| = 63$

| Year | $T_{inter}(7, 9, 152)$ | ... | $T_{inter}(7, 9, 243)$ |
|------|------------------------|-----|------------------------|
| 1929 | 12.328571              | ... | 10.622857              |
| ...  | ...                    | ... | ...                    |
| 2016 | 11.374286              | ... | 10.622857              |

### Tracheids data.

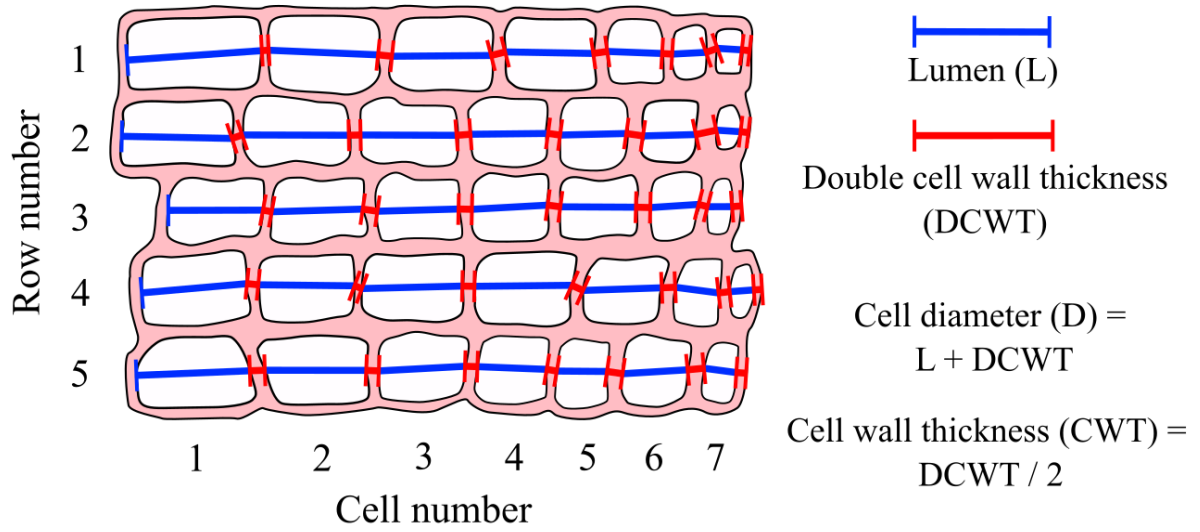

**Figure S3.** Example of cell measurements for the year 1653 of Tree №2.

### Input data.

1.  $T = \{t_1, \dots, t_7\}$  is the set of trees.
2.  $Y(t) = \{y_{t1}, \dots, y_{tn_t}\}$  is the set of years for which the cell measurements for the tree  $t$  are available,  $t \in T$
3.  $Y = \bigcup_{t \in T} Y(t) = \{1653, \dots, 2018\}$  is the set of the years for which the measurements are available.
4.  $T(y) = \{t_{y1}, \dots, t_{ym_y}\}$  is the set of trees for which the measurements for the year  $y$  are available,  $y \in Y$

$$\left( T \equiv \bigcup_{y \in Y} T(y) \right)$$

5.  $e^{raw} = e^{raw}(t, y) = \{e_1^{raw}, \dots, e_\varepsilon^{raw}\}$  are the raw tracheid data where:

$$e_k^{raw} = e_k^{raw}(t, y) \in \{d_k^{raw}, c_k^{raw}\}$$

$d_k^{raw} = d_k^{raw}(t, y)$  is the diameter of the  $k^{th}$  cell in a raw tracheid

$c_k^{raw} = c_k^{raw}(t, y)$  is the cell wall thickness of the  $k^{th}$  cell in a raw tracheid

$\varepsilon = \varepsilon(t, y)$  is the number of cells in  $e^{raw}(t, y)$

$$k = \overline{1, \varepsilon}, t \in T, y \in Y(t)$$

6.  $n = 15$  is the number of cells for the tracheid standardization procedure.

### Description of the standardization procedure.

For each  $e^{raw}$  an intermediate sequence  $e^*$  is constructed as a set:

$$e^* = \{\underbrace{e_1^{raw}, \dots, e_1^{raw}}_n, \underbrace{e_2^{raw}, \dots, e_2^{raw}}_n, \dots, \underbrace{e_\varepsilon^{raw}, \dots, e_\varepsilon^{raw}}_n\}$$

The tracheid data  $e = \{e_1, \dots, e_n\}$  standardized to  $n$  cells are obtained by:

$$e_i = \frac{1}{\varepsilon} \sum_{j=\varepsilon \cdot (i-1)+1}^{\varepsilon \cdot i} e_j^*, i = \overline{1, n}$$

Using this procedure, the following sets were obtained:

$d = \{d_1, \dots, d_n\}$  are the tracheid cell diameters standardized to  $n$  cells;

$c = \{c_1, \dots, c_n\}$  are the tracheid cell wall thicknesses standardized to  $n$  cells.

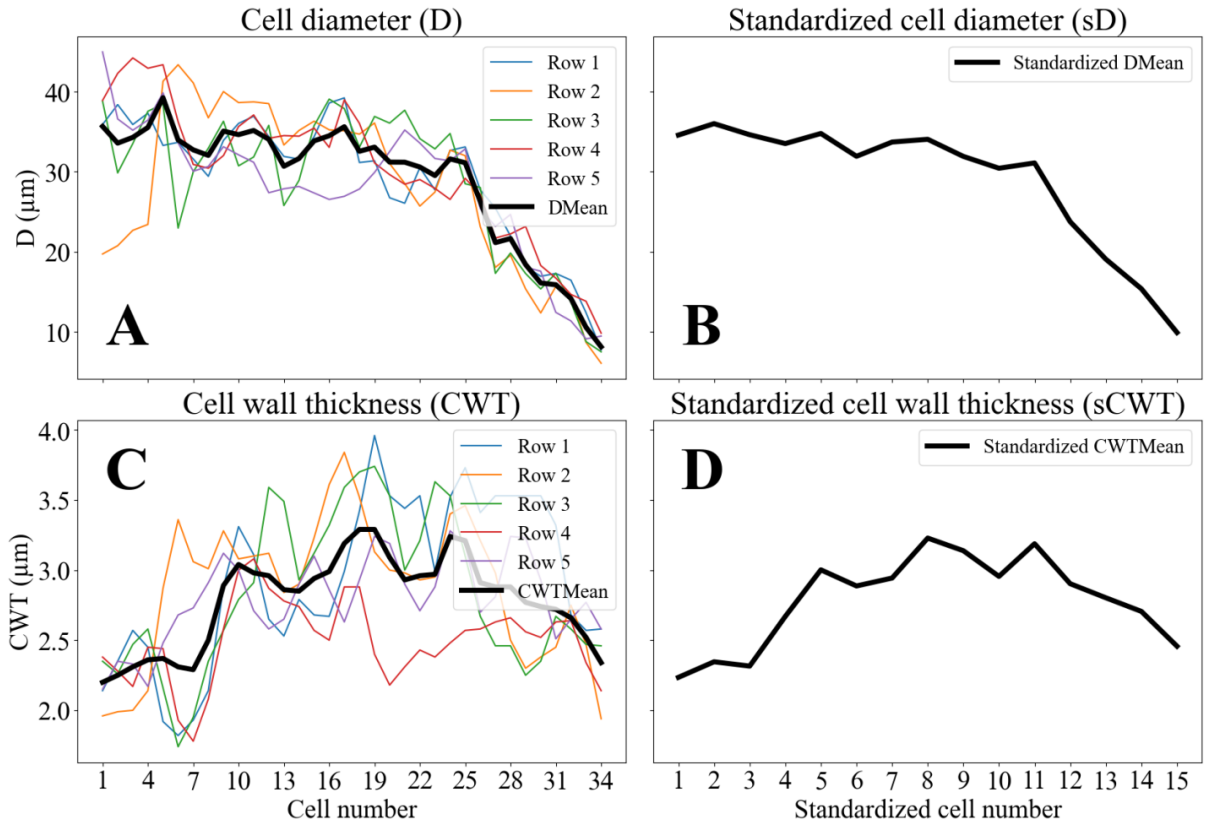

**Figure S4.** Dmean (A) and CWTmean (C) tracheidograms for the year 1653 of Tree №1, and their standardization to 15 cells (B,D).

### Description of the standardized tracheidogram.

A tracheidogram standardized to  $N$  cells is considered as a set:

$$R(t, y) = d \cup c = \{d_1, \dots, d_n, c_1, \dots, c_n\},$$

where:

$d_i = d_i(t, y)$  is the diameter of the  $i^{th}$  cell in the standardized tracheidogram;

$c_i = c_i(t, y)$  is the cell wall thickness of the  $i^{th}$  cell in the standardized tracheidogram;

$$i = \overline{1, n}, t \in T, y \in Y(t).$$

### Developing annual (year-to-year) mean standardized tracheidograms.

A mean standardized tracheidogram  $R_{mean}(y)$  is obtained as a simple average of individual  $R(t, y)$  for each tree:

$$R_{mean}(y) = \frac{1}{|T(y)|} \sum_{t \in T(y)} R(t, y), y \in Y.$$

$R_{mean}(y)$  can be considered as a set:

$$R_{mean}(y) = \{d_1^{mean}(y), \dots, d_n^{mean}(y), c_1^{mean}(y), \dots, c_n^{mean}(y)\},$$

where  $y \in \{1653, \dots, 2018\}$  is the year over 1653-2018 (see Table S4).

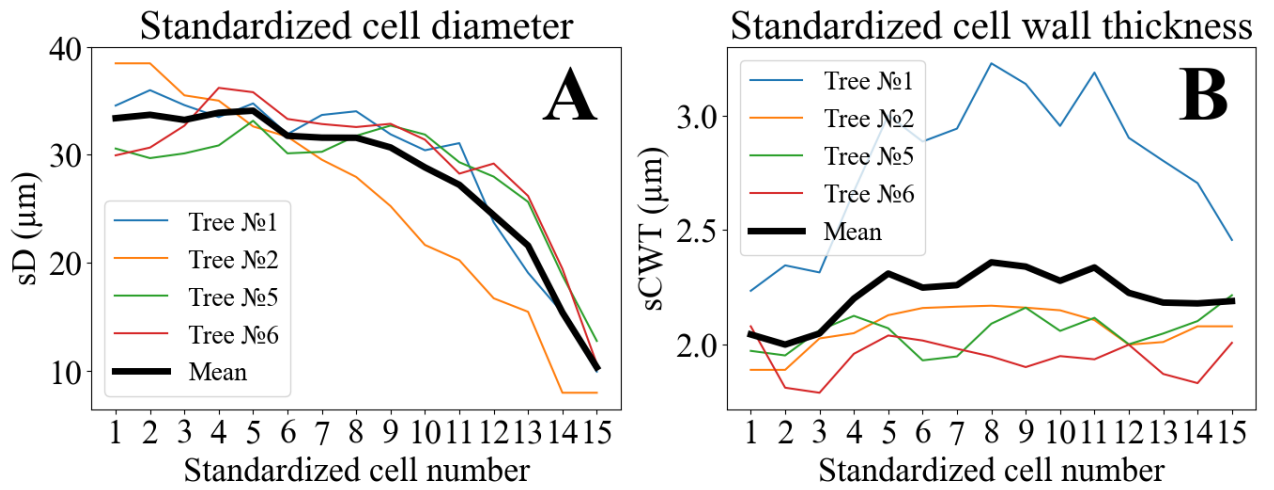

**Figure S5.** Example of the mean standardized tracheidograms (thick black curves) for the 1653 year: radial cell diameter (A) and cell wall thickness (B).

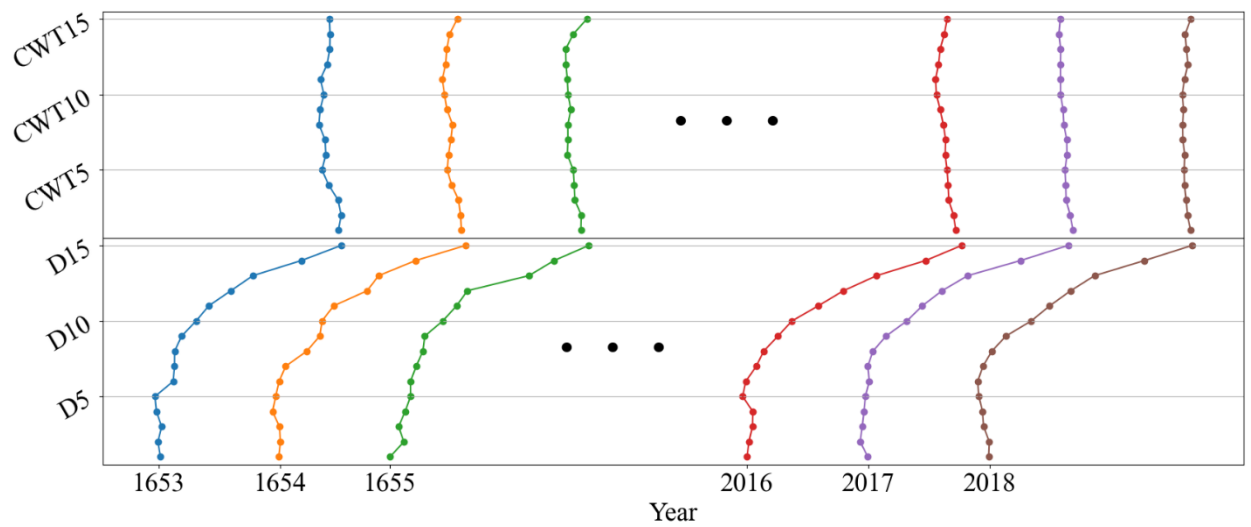

**Figure S6.** Obtained tracheidogram objects

**Table S2.** Examples of thirty ( $2 \cdot n = 30$ ) mean tracheidogram chronologies

| Year | $d_1^{mean}$ | ... | $d_n^{mean}$ | $c_1^{mean}$ | ... | $c_n^{mean}$ |
|------|--------------|-----|--------------|--------------|-----|--------------|
| 1653 | 33.396263    | ... | 10.315296    | 2.044464     | ... | 2.190193     |
| ...  | ...          | ... | ...          | ...          | ... | ...          |
| 2018 | 36.341875    | ... | 10.376250    | 2.311458     | ... | 2.308333     |

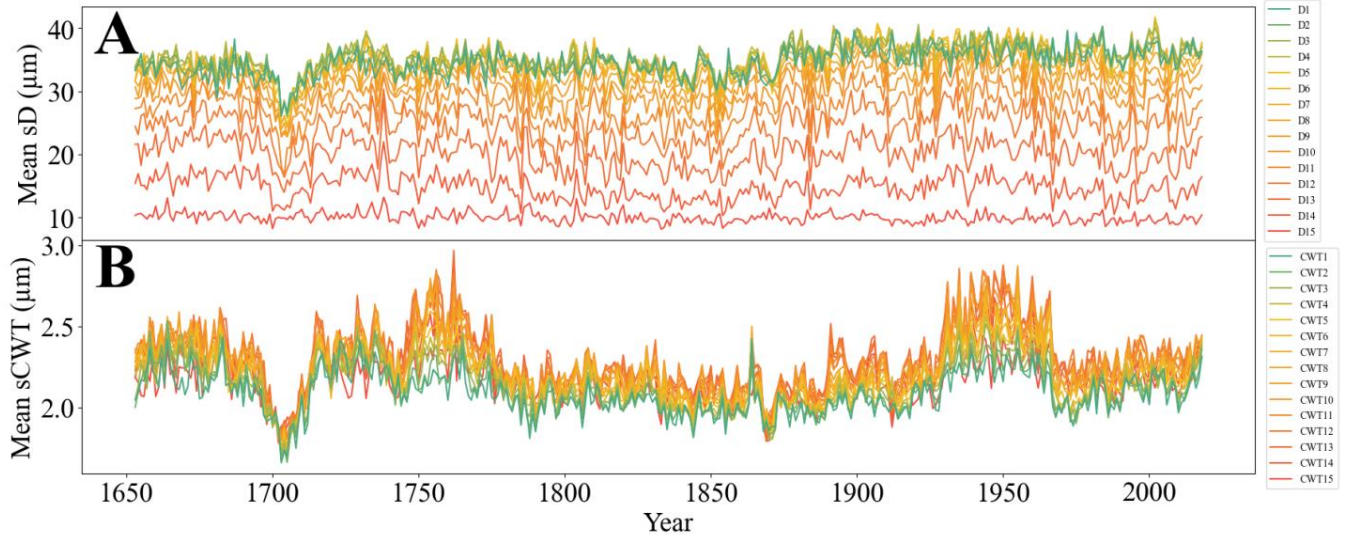

**Figure S7.** The obtained 30 cell chronologies: 15 mean standardized cell diameters (A) and corresponding 15 cell wall thicknesses (B).

Then, inter-annual smoothed tracheid chronologies ( $d_i^W, c_i^W$ ) with the sliding window  $W$  were obtained by:

$$d_i^W = \left\{ \frac{\sum_{y \in [year - \lfloor \frac{W}{2} \rfloor \dots year + \lfloor \frac{W}{2} \rfloor]} d_i^{mean}(y)}{W} \middle| year \in \{1929 \dots 2016\} \right\},$$

$$c_i^W = \left\{ \frac{\sum_{y \in [year - \lfloor \frac{W}{2} \rfloor \dots year + \lfloor \frac{W}{2} \rfloor]} c_i^{mean}(y)}{W} \middle| year \in \{1929 \dots 2016\} \right\},$$

where  $i = \overline{1, n}$ .

**Table S3.** Example of inter-annual smoothed tracheid chronologies for  $W = 9$

| Year | $d_1^9$   | ... | $d_n^9$   | $c_1^9$  | ... | $c_n^9$  |
|------|-----------|-----|-----------|----------|-----|----------|
| 1653 | 33.951284 | ... | 10.281403 | 2.142082 | ... | 2.140274 |
| ...  | ...       | ... | ...       | ...      | ... | ...      |
| 2018 | 36.376124 | ... | 9.802172  | 2.199169 | ... | 2.258423 |



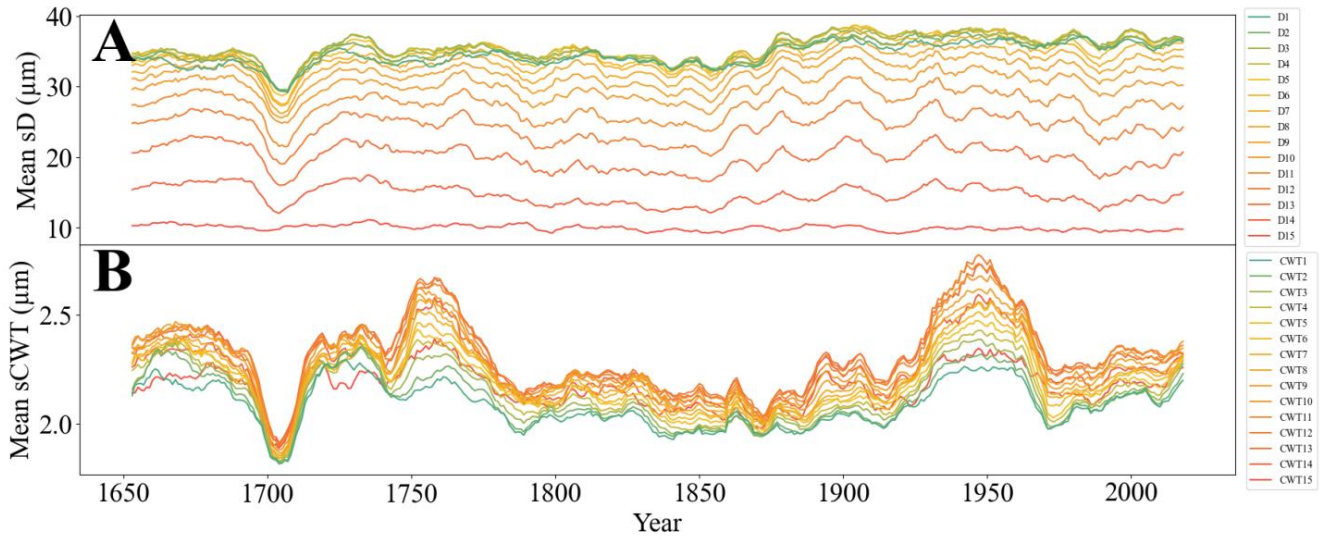

**Figure S8.** Example of 9-year smoothed cell chronologies: mean standardized cell diameters (A) and corresponding cell wall thicknesses.

For the obtained inter-annual smoothed tracheid chronologies (Table S5) we used the principal component analysis and obtained  $2 \cdot n = 30$  PC chronologies (see Table S6).

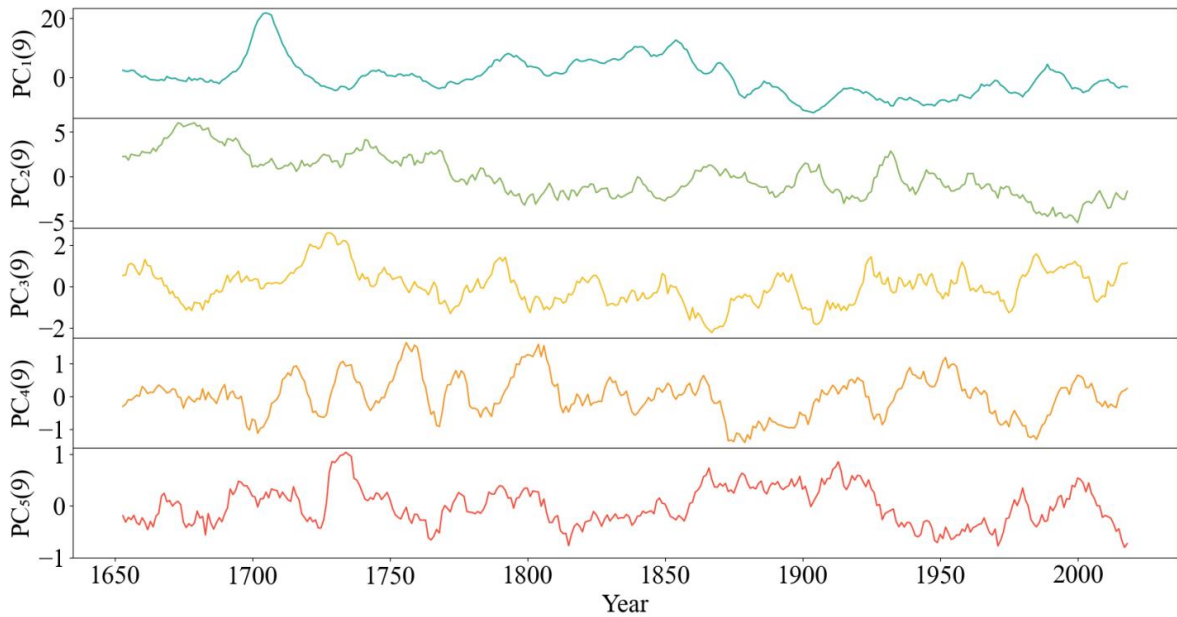

**Figure S9.** First five principal components (PC) of the smoothed (9-year sliding window) tracheid chronologies.

**Table S4.** Example of PC chronologies for  $W = 9$

| Year | $PC_1(9)$ | ... | $PC_{2 \cdot n}(9)$ |
|------|-----------|-----|---------------------|
| 1653 | 4.280042  | ... | 0.001796            |
| ...  | ...       | ... | ...                 |
| 2018 | -7.254340 | ... | -0.009413           |

In other terms:

$$PC_i(W) = \{pc_i^W(y) | y \in \{1653 \dots 2016\}\},$$

where  $i = \overline{1, n}$ .

### Independent variables:

The inter-annual smoothed PC chronologies with the sliding window  $W$ :

$$PC_i(W) = \{pc_i^W(y) | y \in \{1653 \dots 2016\}\},$$

where  $i = \overline{1, P}$ ;

$P$  is the number of first principal components for regression model development, which was varied from 4 (90% of the explained variance) to 9 (99% of the explained variance).

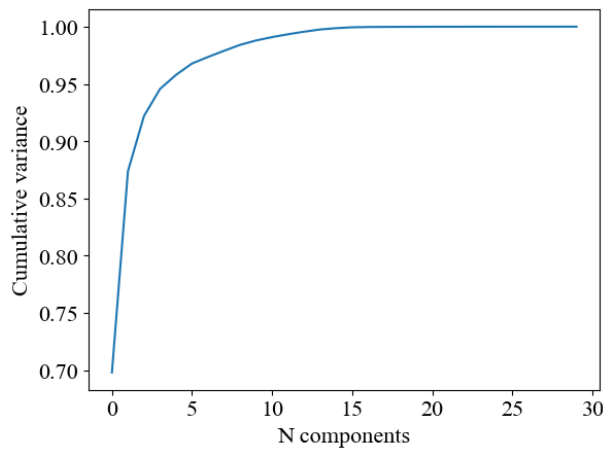

**Figure S10.** Cumulative explained variance of the tracheidogram objects

**Table S5.** PCA transformation matrix for first five principal components

| Tracheid feature | PC1    | PC2    | PC3    | PC4    | PC5    |
|------------------|--------|--------|--------|--------|--------|
| D1               | -0.217 | -0.319 | 0.248  | -0.430 | -0.476 |
| D2               | -0.245 | -0.239 | 0.331  | -0.245 | -0.146 |
| D3               | -0.268 | -0.210 | 0.330  | -0.046 | 0.294  |
| D4               | -0.275 | -0.202 | 0.190  | 0.109  | 0.354  |
| D5               | -0.292 | -0.217 | 0.087  | 0.232  | 0.225  |
| D6               | -0.309 | -0.184 | -0.110 | 0.370  | 0.069  |
| D7               | -0.293 | -0.112 | -0.298 | 0.306  | -0.201 |
| D8               | -0.299 | -0.029 | -0.326 | 0.099  | -0.126 |
| D9               | -0.298 | 0.064  | -0.300 | -0.106 | -0.077 |
| D10              | -0.281 | 0.143  | -0.221 | -0.286 | -0.116 |
| D11              | -0.293 | 0.289  | -0.210 | -0.170 | 0.145  |
| D12              | -0.270 | 0.378  | 0.068  | -0.249 | 0.154  |
| D13              | -0.206 | 0.480  | 0.231  | 0.009  | -0.100 |
| D14              | -0.129 | 0.403  | 0.418  | 0.313  | -0.032 |
| D15              | -0.008 | 0.109  | 0.124  | 0.016  | 0.070  |



|              |        |       |       |       |        |
|--------------|--------|-------|-------|-------|--------|
| <b>CWT1</b>  | -0.010 | 0.015 | 0.052 | 0.069 | -0.084 |
| <b>CWT2</b>  | -0.011 | 0.021 | 0.058 | 0.082 | -0.098 |
| <b>CWT3</b>  | -0.012 | 0.022 | 0.058 | 0.094 | -0.115 |
| <b>CWT4</b>  | -0.012 | 0.022 | 0.053 | 0.103 | -0.125 |
| <b>CWT5</b>  | -0.013 | 0.021 | 0.053 | 0.106 | -0.134 |
| <b>CWT6</b>  | -0.014 | 0.020 | 0.052 | 0.109 | -0.147 |
| <b>CWT7</b>  | -0.014 | 0.019 | 0.050 | 0.116 | -0.163 |
| <b>CWT8</b>  | -0.014 | 0.020 | 0.050 | 0.119 | -0.174 |
| <b>CWT9</b>  | -0.015 | 0.021 | 0.049 | 0.119 | -0.190 |
| <b>CWT10</b> | -0.016 | 0.020 | 0.053 | 0.122 | -0.191 |
| <b>CWT11</b> | -0.016 | 0.020 | 0.053 | 0.121 | -0.191 |
| <b>CWT12</b> | -0.017 | 0.019 | 0.048 | 0.117 | -0.182 |
| <b>CWT13</b> | -0.016 | 0.020 | 0.048 | 0.111 | -0.175 |
| <b>CWT14</b> | -0.014 | 0.018 | 0.045 | 0.092 | -0.151 |
| <b>CWT15</b> | -0.009 | 0.011 | 0.029 | 0.065 | -0.105 |

## Modeling

For the best model fit a triplet of hyperparameters ( $w, W, P$ ) was varied as follows:  
 $w \in \{1, \dots, 14\}, W \in \{1, \dots, 11\}, P \in \{4, \dots, 9\}$

For each triplet ( $w, W, P$ ) we obtained the set of independent variables  $PC_1(W), \dots, PC_P(W)$  and the set of dependent variables  $T_{inter}(w, W, doy), doy \in DOY_{sig}(w, W)$ .

For each  $doy \in DOY_{sig}(w, W)$  a separate multiple linear regression (MLR) model  $MLR_{w,W,P,doy}(year)$  was developed.

The final MLR models were considered as ensembles of the individual MLR models obtained in the rolling leave-one-out cross-validation (RLOO CV) procedure:

$$MLR_{w,W,P,doy}(year) = k_0 + \sum_{l=1}^P k_l \cdot pc_l^W(y),$$

where:  $k_l = k_l(w, W, P, doy) = \frac{\sum_{\theta=1}^{N(W)} k_l^\theta}{N}, l = \overline{0, P};$

$k_l^\theta = k_l^\theta(w, W, P, doy)$  is the  $l^{\text{th}}$  coefficient of the  $\theta^{\text{th}}$  individual MLR model, obtained in the RLOO CV procedure.

$N = 2016 - 1929 + 1 = 88$  is the total number of the individual MLR models, obtained in the RLOO CV procedure;

$$MLR_{w,W,P,doy}^\theta(year) = k_0^\theta + \sum_{l=1}^P k_l^\theta \cdot pc_l^W(y), \theta = \overline{1929, 2016}$$

$MLR_{w,W,P,doy}^{\theta}(year)$  is the  $\theta^{\text{th}}$  individual MLR model, obtained in the RLOO CV procedure.

To obtain the  $\theta^{\text{th}}$  individual MLR model,  $T_{inter}(w, W, doy)$  was split into calibration ( $T_{inter}^{cal}(w, W, doy)$ ) and verification ( $T_{inter}^{ver}(w, W, doy)$ ) sets by the rules of the **RLOO CV procedure**:

1. The  $\theta^{\text{th}}$  element (year) of  $T_{inter}(w, W, doy)$  is considered as a verification set
2. The elements from  $\left[\theta - \left\lfloor \frac{W}{2} \right\rfloor, \theta\right) \cup \left(\theta, \theta + \left\lfloor \frac{W}{2} \right\rfloor\right]$  are omitted ( $\left\lfloor \frac{W}{2} \right\rfloor$  is the floored division).

This is done to prevent the data from the  $\theta^{\text{th}}$  element from getting into the calibration set due to smoothing with the  $W$  inter-annual sliding window and affecting the elements from  $\left[\theta - \left\lfloor \frac{W}{2} \right\rfloor, \theta\right) \cup \left(\theta, \theta + \left\lfloor \frac{W}{2} \right\rfloor\right]$ .

All the indices from  $\theta - \left\lfloor \frac{W}{2} \right\rfloor < 1929$  or  $\theta + \left\lfloor \frac{W}{2} \right\rfloor > 2016$  are ignored

3. All other elements are considered as a calibration set

| Model № | Year | 1929  | 1930  | 1931  | 1932  | 1933  | 1934  | 1935  | 1936  | 1937  | 1938  | 1939  | 1940  | ... | 2005  | 2006  | 2007  | 2008  | 2009  | 2010  | 2011  | 2012  | 2013  | 2014  | 2015  | 2016  |
|---------|------|-------|-------|-------|-------|-------|-------|-------|-------|-------|-------|-------|-------|-----|-------|-------|-------|-------|-------|-------|-------|-------|-------|-------|-------|-------|
| 1929    |      | 12.33 | 12.34 | 12.35 | 12.27 | 12.33 | 12.15 | 12.25 | 11.97 | 12.40 | 12.54 | 13.20 | 13.31 |     | 14.61 | 14.06 | 14.26 | 14.16 | 13.76 | 13.35 | 13.56 | 13.67 | 13.03 | 12.50 | 12.17 | 11.37 |
| 1930    |      | 12.33 | 12.34 | 12.35 | 12.27 | 12.33 | 12.15 | 12.25 | 11.97 | 12.40 | 12.54 | 13.20 | 13.31 |     | 14.61 | 14.06 | 14.26 | 14.16 | 13.76 | 13.35 | 13.56 | 13.67 | 13.03 | 12.50 | 12.17 | 11.37 |
| 1931    |      | 12.33 | 12.34 | 12.35 | 12.27 | 12.33 | 12.15 | 12.25 | 11.97 | 12.40 | 12.54 | 13.20 | 13.31 |     | 14.61 | 14.06 | 14.26 | 14.16 | 13.76 | 13.35 | 13.56 | 13.67 | 13.03 | 12.50 | 12.17 | 11.37 |
| 1932    |      | 12.33 | 12.34 | 12.35 | 12.27 | 12.33 | 12.15 | 12.25 | 11.97 | 12.40 | 12.54 | 13.20 | 13.31 | ... | 14.61 | 14.06 | 14.26 | 14.16 | 13.76 | 13.35 | 13.56 | 13.67 | 13.03 | 12.50 | 12.17 | 11.37 |
| 1933    |      | 12.33 | 12.34 | 12.35 | 12.27 | 12.33 | 12.15 | 12.25 | 11.97 | 12.40 | 12.54 | 13.20 | 13.31 |     | 14.61 | 14.06 | 14.26 | 14.16 | 13.76 | 13.35 | 13.56 | 13.67 | 13.03 | 12.50 | 12.17 | 11.37 |
| 1934    |      | 12.33 | 12.34 | 12.35 | 12.27 | 12.33 | 12.15 | 12.25 | 11.97 | 12.40 | 12.54 | 13.20 | 13.31 |     | 14.61 | 14.06 | 14.26 | 14.16 | 13.76 | 13.35 | 13.56 | 13.67 | 13.03 | 12.50 | 12.17 | 11.37 |
| 1935    |      | 12.33 | 12.34 | 12.35 | 12.27 | 12.33 | 12.15 | 12.25 | 11.97 | 12.40 | 12.54 | 13.20 | 13.31 |     | 14.61 | 14.06 | 14.26 | 14.16 | 13.76 | 13.35 | 13.56 | 13.67 | 13.03 | 12.50 | 12.17 | 11.37 |
| ...     |      |       |       |       |       |       |       |       |       |       |       |       |       | ... |       |       |       |       |       |       |       |       |       |       |       |       |
| 2010    |      | 12.33 | 12.34 | 12.35 | 12.27 | 12.33 | 12.15 | 12.25 | 11.97 | 12.40 | 12.54 | 13.20 | 13.31 |     | 14.61 | 14.06 | 14.26 | 14.16 | 13.76 | 13.35 | 13.56 | 13.67 | 13.03 | 12.50 | 12.17 | 11.37 |
| 2011    |      | 12.33 | 12.34 | 12.35 | 12.27 | 12.33 | 12.15 | 12.25 | 11.97 | 12.40 | 12.54 | 13.20 | 13.31 |     | 14.61 | 14.06 | 14.26 | 14.16 | 13.76 | 13.35 | 13.56 | 13.67 | 13.03 | 12.50 | 12.17 | 11.37 |
| 2012    |      | 12.33 | 12.34 | 12.35 | 12.27 | 12.33 | 12.15 | 12.25 | 11.97 | 12.40 | 12.54 | 13.20 | 13.31 |     | 14.61 | 14.06 | 14.26 | 14.16 | 13.76 | 13.35 | 13.56 | 13.67 | 13.03 | 12.50 | 12.17 | 11.37 |
| 2013    |      | 12.33 | 12.34 | 12.35 | 12.27 | 12.33 | 12.15 | 12.25 | 11.97 | 12.40 | 12.54 | 13.20 | 13.31 | ... | 14.61 | 14.06 | 14.26 | 14.16 | 13.76 | 13.35 | 13.56 | 13.67 | 13.03 | 12.50 | 12.17 | 11.37 |
| 2014    |      | 12.33 | 12.34 | 12.35 | 12.27 | 12.33 | 12.15 | 12.25 | 11.97 | 12.40 | 12.54 | 13.20 | 13.31 |     | 14.61 | 14.06 | 14.26 | 14.16 | 13.76 | 13.35 | 13.56 | 13.67 | 13.03 | 12.50 | 12.17 | 11.37 |
| 2015    |      | 12.33 | 12.34 | 12.35 | 12.27 | 12.33 | 12.15 | 12.25 | 11.97 | 12.40 | 12.54 | 13.20 | 13.31 |     | 14.61 | 14.06 | 14.26 | 14.16 | 13.76 | 13.35 | 13.56 | 13.67 | 13.03 | 12.50 | 12.17 | 11.37 |
| 2016    |      | 12.33 | 12.34 | 12.35 | 12.27 | 12.33 | 12.15 | 12.25 | 11.97 | 12.40 | 12.54 | 13.20 | 13.31 |     | 14.61 | 14.06 | 14.26 | 14.16 | 13.76 | 13.35 | 13.56 | 13.67 | 13.03 | 12.50 | 12.17 | 11.37 |

**Figure S11.** Visualization of the Rolling Leave-One-Out Cross Validation procedure for the data with the sliding windows  $w=7$ ,  $W=9$ , for the  $doy=152$ . The red cells are considered as a verification set for the corresponding model, the gray cells are omitted, and the white cells are considered as a calibration set for the corresponding model.

**Table S6.** Example of the calibration and verification sets for  $w = 7$ ,  $W = 9$ ,  $doy = 152$ ,  $\theta = 2000$ :

| Year             | $T_{inter}^{ver}(7, 9, 152)$ |
|------------------|------------------------------|
| 2000             | 14.922222                    |
| Verification set |                              |
| Year             | $T_{inter}^{cal}(7, 9, 152)$ |
| 1929             | 12.328571                    |
| ...              | ...                          |
| 1995             | 13.076190                    |
| 2005             | 14.922222                    |

|      |           |
|------|-----------|
| ...  | ...       |
| 2016 | 11.374286 |

Calibration set

After obtaining the calibration and verification sets, the coefficients  $k_l^\theta$  of the  $\theta^{\text{th}}$  individual MLR model are obtained by training the model on the calibration set.

To evaluate the individual models on the calibration sets, the coefficient of determination ( $R_{cal,\theta}^2$ ) and the Root Mean Squared Error ( $RMSE_{cal,\theta}$ ) were calculated between  $T_{inter}^{cal}(w, W, doy)$  and  $\{MLR_{w,W,P,doy}^\theta(year) | year \in T_{inter}^{cal}(w, W, doy)\}$ .

After training the  $N = 88$  models, one for each year, the chronology of the verification values was obtained as:

$$CRN_{w,W,P,doy}^{ver} = \{MLR_{w,W,P,doy}^{1929}(1929), \dots, MLR_{w,W,P,doy}^{2016}(2016)\}$$

and the mean metrics  $R_{cal}^2 = \frac{\sum_{\theta=1929}^{2016} R_{cal,\theta}^2}{N}$ ,  $RMSE_{cal} = \frac{\sum_{\theta=1929}^{2016} RMSE_{cal,\theta}}{N}$  were calculated to evaluate the total quality of the individual models on the calibration set.

To evaluate the individual models on the verification set,  $R_{ver}^2$  and  $RMSE_{ver}$  were calculated between  $CRN_{w,W,P,doy}^{ver}$  and  $T_{inter}(w, W, doy)$ .

After the individual evaluating, the final MLR model  $MLR_{w,W,P,doy}(year)$  was developed by averaging the coefficients of the individual models.

To evaluate the final model,  $R_{sim}^2$  and  $RMSE_{sim}$  ( $sim$  – simulated) were calculated between  $T_{inter}(w, W, doy)$  and  $\{MLR_{w,W,P,doy}(year) | year \in T_{inter}(w, W, doy)\}$ .

**Table S7.** Model coefficients

| Period | PC1    | PC2    | PC3    | PC4   | PC5   | Constant |
|--------|--------|--------|--------|-------|-------|----------|
| A      | -0.280 | -0.524 | -1.034 | 0.128 | 0.399 | 11.761   |
| B      | 0.200  | -0.152 | -0.233 | 0.565 | 0.627 | 18.621   |
