# Supplementary material for: Tracheids vs. Tree Rings as Proxies for Dendroclimatic Reconstruction at High Altitude: The Case of Pinus sibirica Du Tour
Source: MDPI journal article supplement (doi:10.3390/f15010167), 2024-01-12
Supplement: s1 [file s1]

Archive with 1 entries (1 files):
- forests-2743744-supplementary.pdf
